# Supplementary material
Source: PubMed Central journal article supplement (PMC489996)

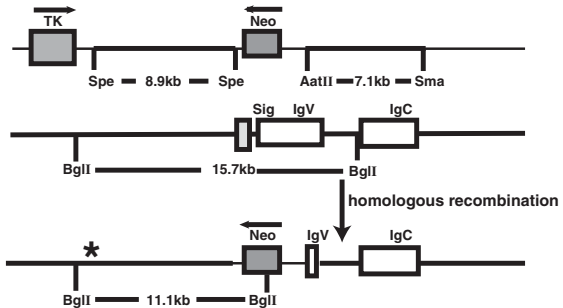

Supplement: pnas_101_29_10691__1.pdf [file pnas_101_29_10691__1.pdf]

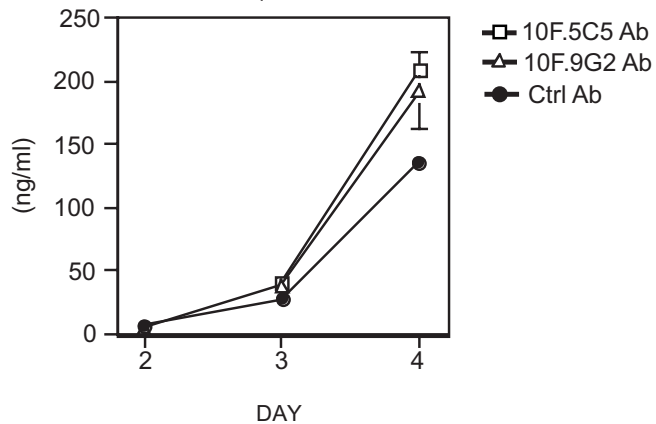

Supplement: pnas_101_29_10691__2.pdf [file pnas_101_29_10691__2.pdf]

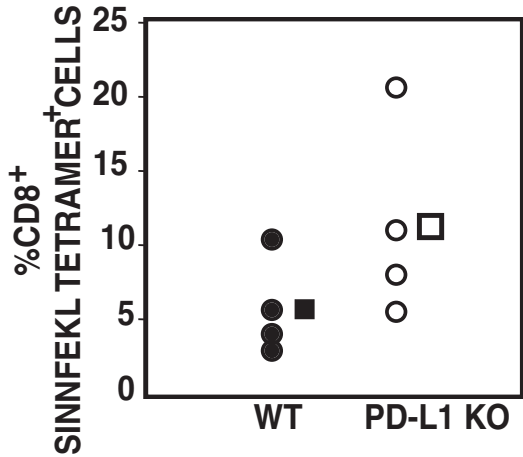

Supplement: pnas_101_29_10691__3.pdf [file pnas_101_29_10691__3.pdf]

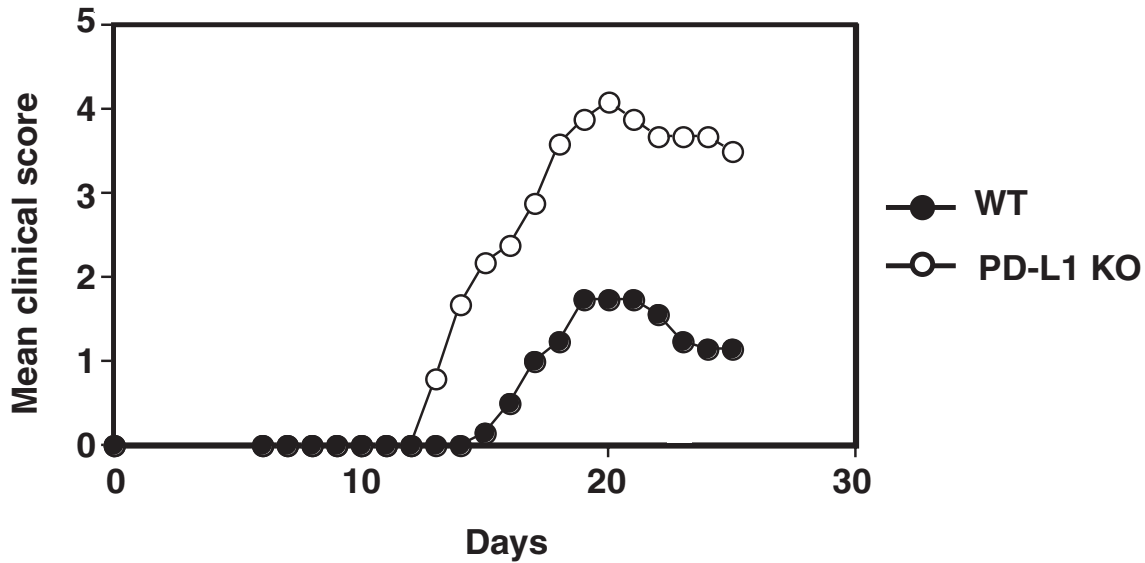

Supplement: pnas_101_29_10691__4.pdf [file pnas_101_29_10691__4.pdf]
